# Supplementary material for: Online yoga programme for resident physicians in Québec: an evaluation of feasibility and impact on mental health
Source: HighWire-hosted journal article supplement (doi:10.1136/bmjopen-2023-082391), 2024-09-01

Supplemental figures

Supplemental Figure 1  
Flow diagram showing participant selection and timepoints for assessment.

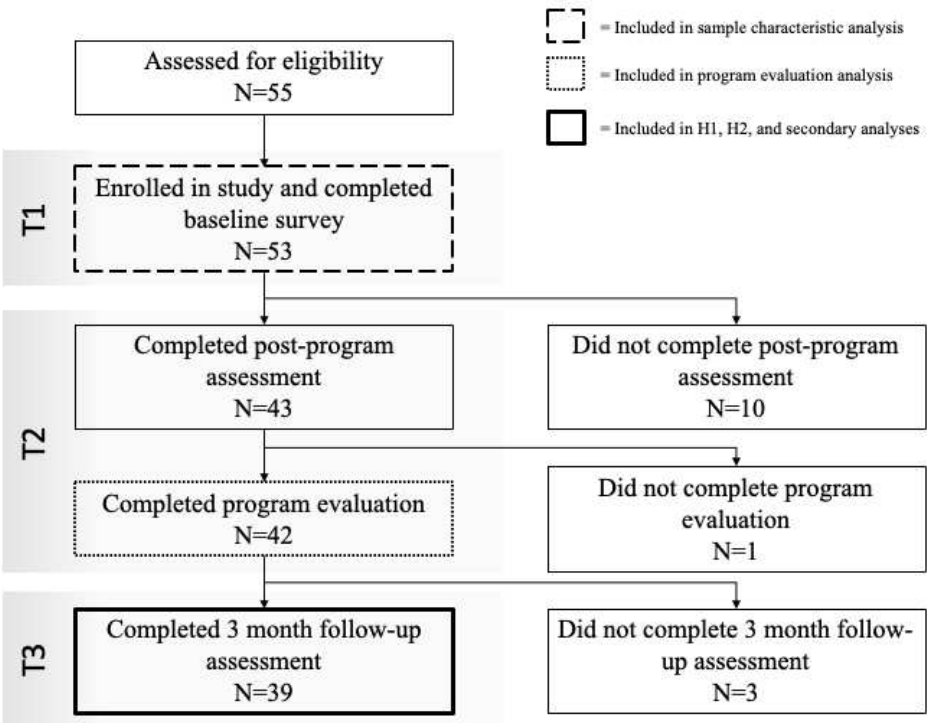

Supplemental Figure 2  
Comparison of mean scores for (A) depression, (B) anxiety, and (C) compassion satisfaction at baseline (T1) and upon PYB-R completion (T2) between residents with low QWL (<25<sup>th</sup> percentile) or good QWL (≥25<sup>th</sup> percentile)]. CS, compassion satisfaction; PYB-R, Bali Yoga Program for Residents; QWL, quality of work life.

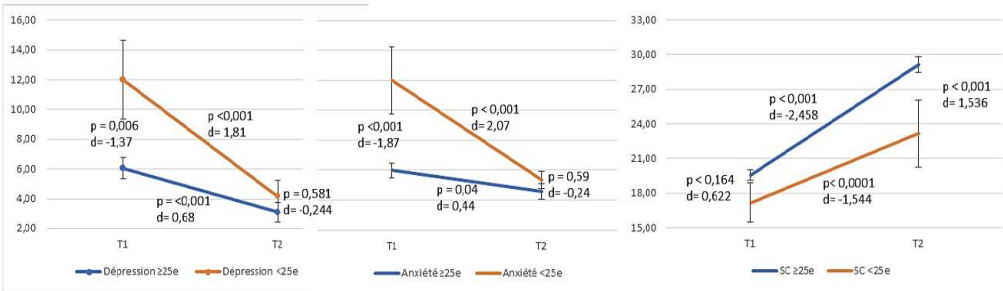

Supplement: bmjopen-2023-082391supp001_data_supplement.pdf [file bmjopen-2023-082391supp001_data_supplement.pdf]
